# Supplementary material
Source: PubMed Central journal article supplement (PMC5805629)
Supplement: NIHMS931890-supplement-Fig_S1__Table_S1.pdf [file NIHMS931890-supplement-Fig_S1__Table_S1.pdf]

## Supporting Information

Comprehensive Synthesis of Amino Acid-derived Thiazole Peptidomimetic Analogues to  
Understand Enigmatic Drug/Substrate-Binding Site of P-glycoprotein

*Bhargav A. Patel<sup>†,§</sup>, Biebele Abel<sup>‡</sup>, Anna Maria Barbuti<sup>†</sup>, Uday Kiran Velagapudi<sup>†</sup>, Zhe-Sheng  
Chen<sup>†</sup>, Suresh V. Ambudkar<sup>\*,‡</sup>, Tanaji T. Talele<sup>\*,†</sup>*

<sup>†</sup>Department of Pharmaceutical Sciences, College of Pharmacy and Health Sciences, St. John's  
University, Queens, NY 11439, USA

<sup>‡</sup>Laboratory of Cell Biology, Center for Cancer Research, National Cancer Institute, National  
Institutes of Health, Bethesda, MD 20892, USA

### Contents of SI

|                                                                                                                                           |       |
|-------------------------------------------------------------------------------------------------------------------------------------------|-------|
| <b>Figure S1.</b> <sup>1</sup> H-NMR spectrums of compounds <b>39</b> , <b>53</b> , <b>77</b> , <b>81-84</b> in DMSO-d <sub>6</sub> ..... | S2-S5 |
| <b>Table S1.</b> Molecular descriptors of synthesized compounds.....                                                                      | S6-S8 |

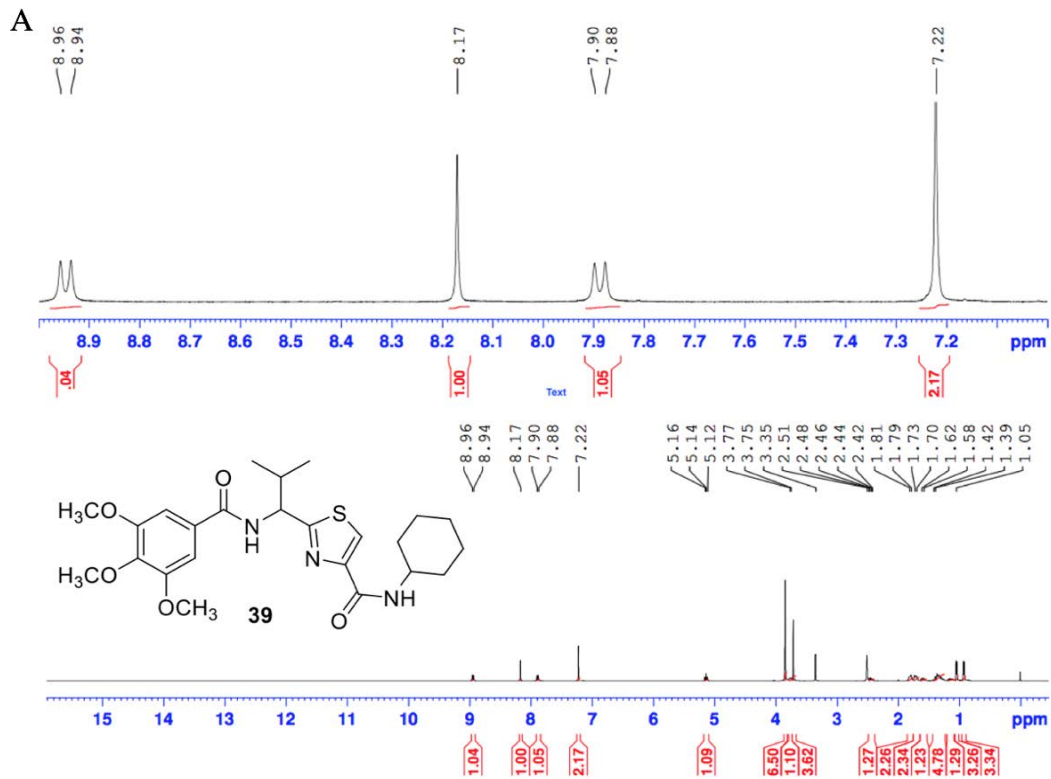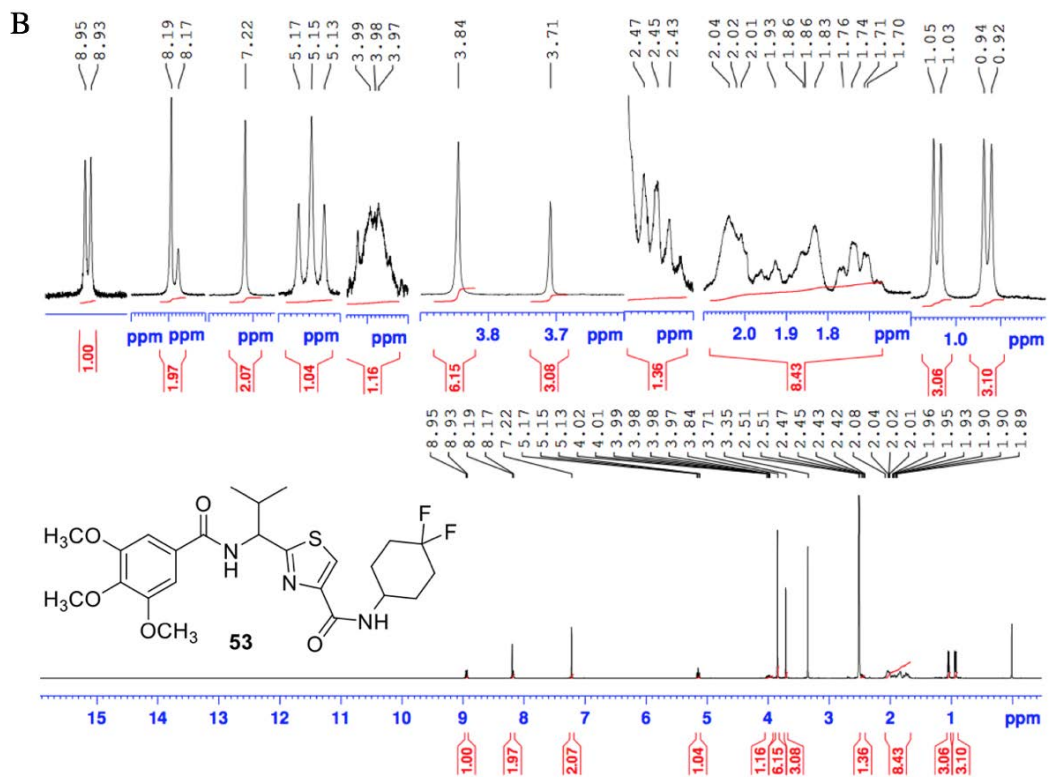

C

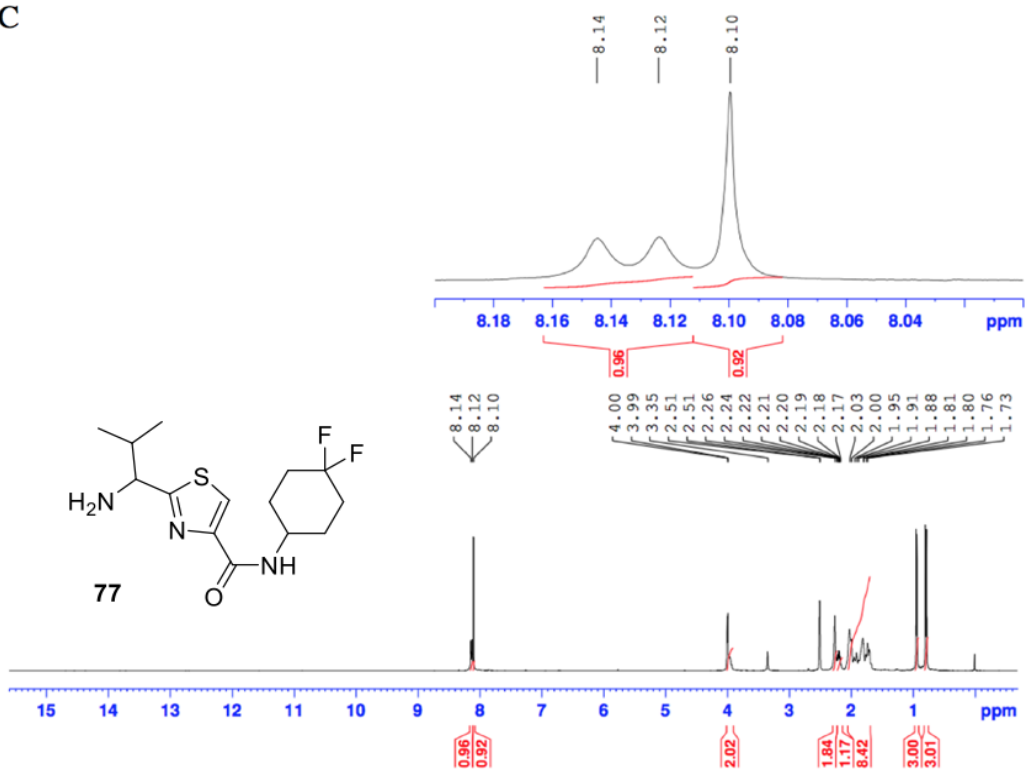

D

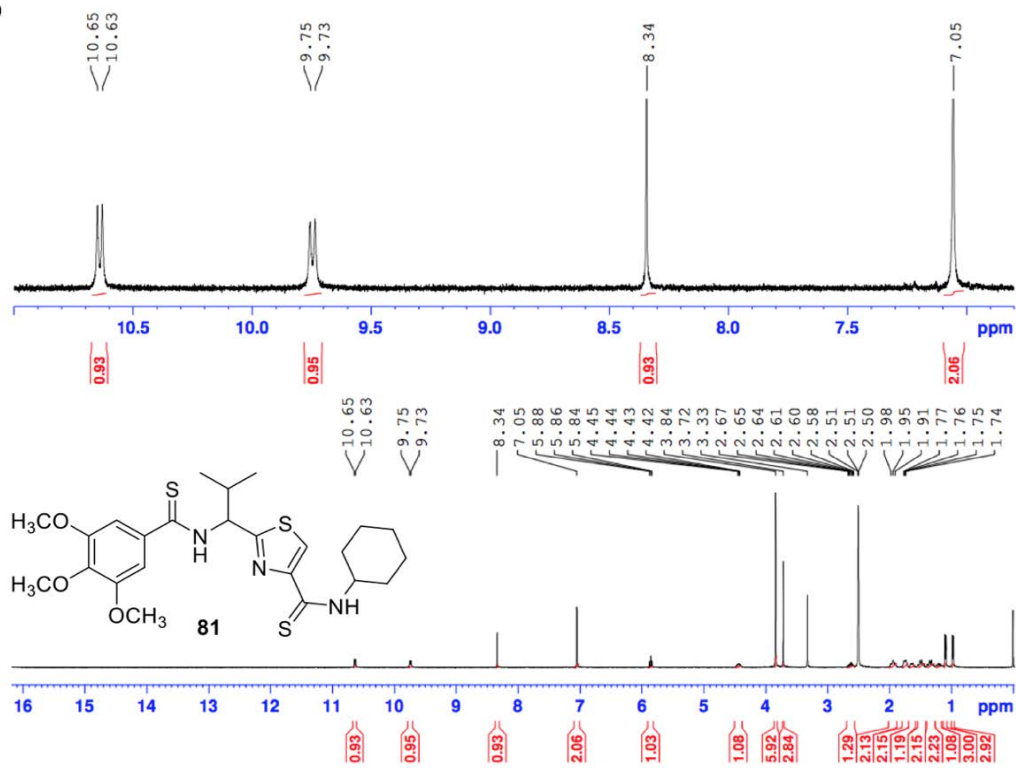

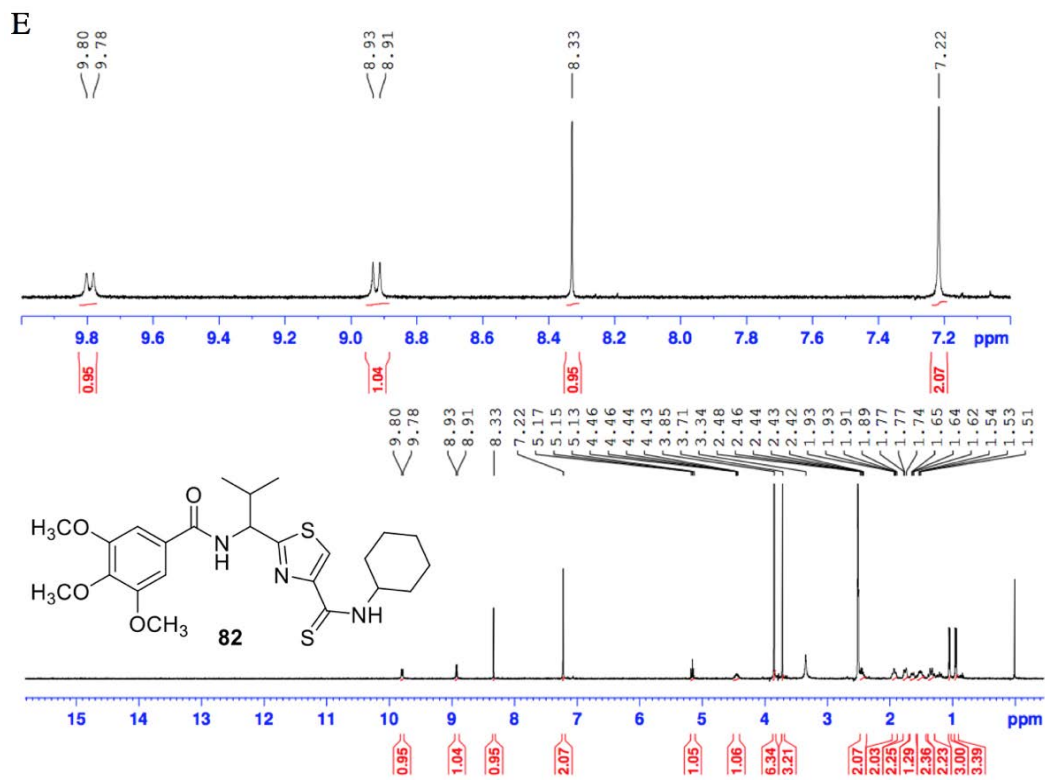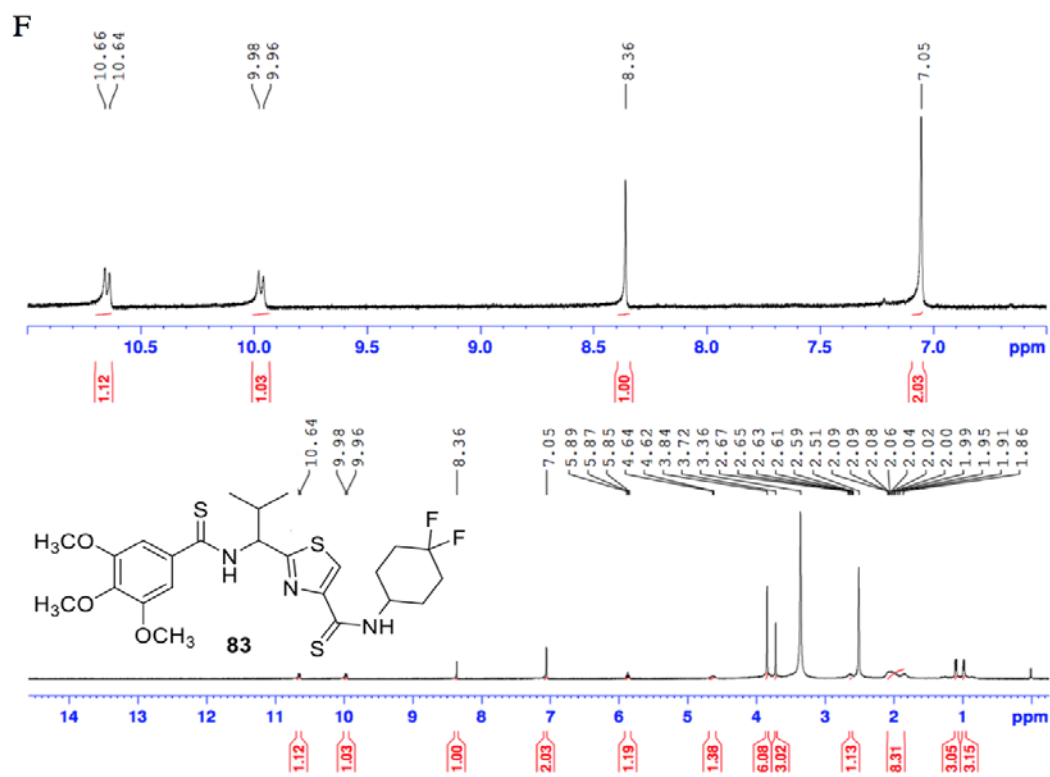

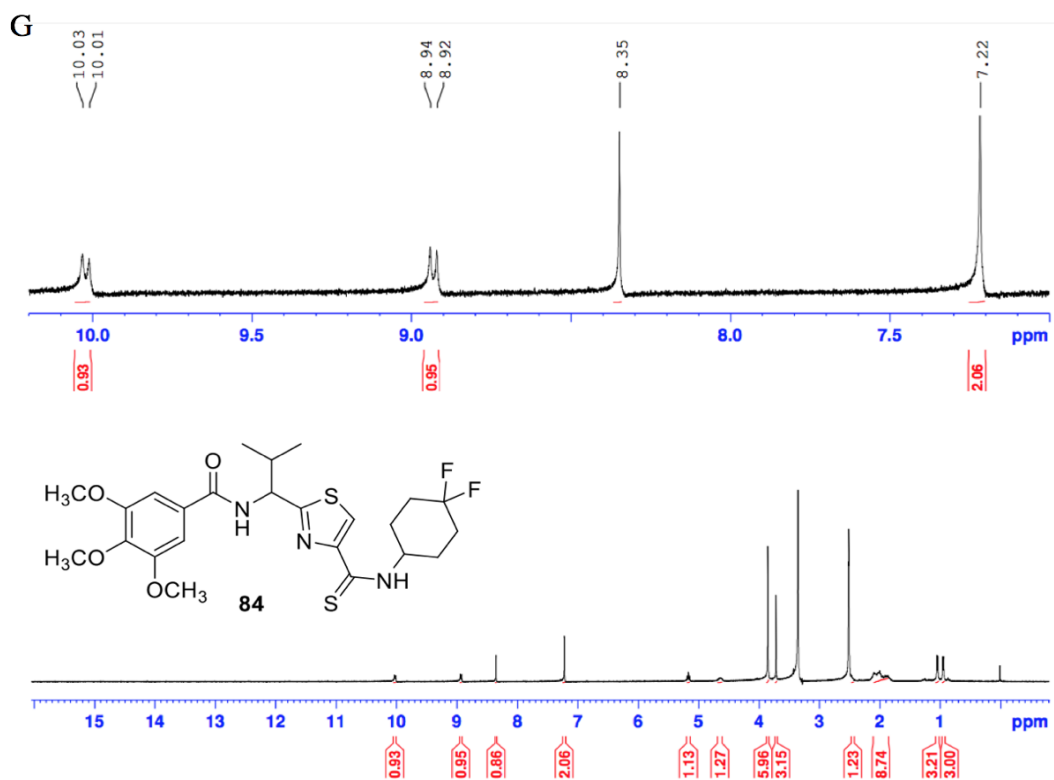

**Figure S1.** <sup>1</sup>H-NMR spectrums of compounds (A) **39**, (B) **53**, (C) **77**, (D) **81**, (E) **82**, (F) **83**, (G) **84** in DMSO-d<sub>6</sub>.

**Table S1. Calculated molecular descriptors for target compounds**

| Comp . | AlogP <sup>a</sup> | HBA <sub>a</sub> | HBD <sub>a</sub> | PSA <sup>a</sup> | Rotatable bonds <sup>a</sup> | Mol. Wt. <sub>b</sub> | No. of N and O <sup>b</sup> | Molar refractivity <sub>c</sub> | Molar volume <sup>c</sup> | A <sup>d</sup> | B <sup>d</sup> |
|--------|--------------------|------------------|------------------|------------------|------------------------------|-----------------------|-----------------------------|---------------------------------|---------------------------|----------------|----------------|
| 1      | 4.98               | 7                | 2                | 144.09           | 11                           | 573.67                | 9                           | 159.10                          | 452.80                    | -0.13          | 2.64           |
| 5      | 4.98               | 7                | 2                | 144.09           | 11                           | 573.67                | 9                           | 159.10                          | 452.80                    | -0.16          | 2.65           |
| 7      | 4.98               | 7                | 2                | 144.09           | 11                           | 573.67                | 9                           | 159.10                          | 452.80                    | -0.12          | 2.59           |
| 18     | 4.36               | 7                | 3                | 156.12           | 11                           | 588.69                | 10                          | 163.88                          | 453.50                    | -0.11          | 2.87           |
| 19     | 4.36               | 7                | 3                | 156.12           | 11                           | 588.69                | 10                          | 163.88                          | 453.50                    | -0.09          | 2.86           |
| 20     | 5.14               | 7                | 2                | 136.25           | 11                           | 561.66                | 9                           | 155.75                          | 445.20                    | -0.48          | 2.45           |
| 21     | 5.55               | 6                | 2                | 127.02           | 11                           | 559.69                | 8                           | 158.62                          | 454.10                    | -0.26          | 2.44           |
| 28     | 5.73               | 7                | 2                | 144.09           | 11                           | 652.57                | 9                           | 166.79                          | 469.00                    | -0.11          | 2.63           |
| 29     | 3.81               | 7                | 2                | 156.45           | 12                           | 614.69                | 12                          | NC <sup>e</sup>                 | NC                        | NC             | NC             |
| 31     | 4.29               | 4                | 3                | 142.42           | 8                            | 498.61                | 7                           | 143.30                          | 383.00                    | 0.48           | 2.45           |
| 32     | 3.86               | 4                | 2                | 128.76           | 9                            | 524.61                | 9                           | NC                              | NC                        | NC             | NC             |
| 33     | 3.86               | 4                | 2                | 128.76           | 9                            | 524.61                | 9                           | NC                              | NC                        | NC             | NC             |
| 34     | 3.86               | 4                | 2                | 128.76           | 9                            | 524.61                | 9                           | NC                              | NC                        | NC             | NC             |
| 35     | 4.61               | 4                | 2                | 128.76           | 9                            | 603.51                | 9                           | NC                              | NC                        | NC             | NC             |
| 36     | 2.49               | 6                | 2                | 127.02           | 9                            | 433.53                | 8                           | 113.59                          | 337.30                    | -0.13          | 2.17           |
| 37     | 2.95               | 6                | 2                | 127.02           | 9                            | 447.56                | 8                           | 118.22                          | 353.40                    | -0.14          | 2.20           |
| 38     | 3.41               | 6                | 2                | 127.02           | 9                            | 461.59                | 8                           | 122.85                          | 369.50                    | -0.17          | 2.22           |
| 39     | 3.86               | 6                | 2                | 127.02           | 9                            | 475.61                | 8                           | 127.48                          | 385.60                    | -0.14          | 2.24           |
| 40     | 4.15               | 6                | 2                | 127.02           | 9                            | 527.69                | 8                           | 141.88                          | 414.00                    | 0.03           | 2.42           |
| 41     | 3.47               | 8                | 2                | 156.56           | 11                           | 576.72                | 11                          | 151.75                          | 459.30                    | -0.20          | 2.97           |
| 42     | 1.58               | 6                | 2                | 139.05           | 9                            | 476.60                | 9                           | 126.50                          | 377.00                    | -0.10          | 2.51           |
| 43     | 1.84               | 7                | 2                | 136.25           | 9                            | 477.58                | 9                           | 124.59                          | 375.50                    | -0.29          | 2.41           |
| 44     | 1.83               | 7                | 1                | 135.30           | 8                            | 475.57                | 9                           | 124.88                          | 377.40                    | 0.09           | 2.44           |
| 46     | 2.16               | 6                | 2                | 139.05           | 10                           | 490.63                | 9                           | 132.77                          | 414.60                    | -0.09          | 2.50           |
| 48     | 1.35               | 6                | 1                | 144.25           | 8                            | 476.60                | 9                           | 128.30                          | 388.50                    | -0.14          | 2.52           |
| 50     | 2.67               | 6                | 2                | 153.04           | 10                           | 504.65                | 9                           | 137.59                          | 426.20                    | -0.09          | 2.47           |
| 51     | 1.57               | 8                | 2                | 169.54           | 9                            | 525.65                | 10                          | 131.67                          | 388.40                    | 0.25           | 2.43           |
| 52     | 2.30               | 7                | 2                | 144.09           | 9                            | 489.60                | 9                           | 127.60                          | 382.40                    | 0.09           | 2.40           |
| 53     | 3.11               | 6                | 2                | 127.02           | 9                            | 511.59                | 8                           | 127.73                          | 395.80                    | -0.13          | 2.29           |
| 54     | 4.32               | 6                | 2                | 127.02           | 9                            | 503.67                | 8                           | 136.75                          | 418.20                    | -0.09          | 2.29           |
| 55     | 5.93               | 6                | 1                | 118.23           | 10                           | 557.76                | 8                           | 153.43                          | 462.80                    | -0.12          | 2.62           |
| 56     | 3.24               | 6                | 1                | 121.47           | 9                            | 544.72                | 9                           | 149.42                          | 452.10                    | -0.07          | 2.76           |
| 57     | 3.70               | 6                | 2                | 130.26           | 11                           | 566.73                | 9                           | 156.07                          | 450.20                    | -0.12          | 2.71           |

|     |      |   |   |        |    |        |    |        |        |       |      |
|-----|------|---|---|--------|----|--------|----|--------|--------|-------|------|
| 58  | 2.53 | 8 | 2 | 156.04 | 10 | 554.67 | 11 | 147.04 | 419.90 | -0.09 | 3.22 |
| 59  | 4.60 | 6 | 2 | 127.02 | 9  | 523.66 | 8  | 142.92 | 411.40 | -0.21 | 2.40 |
| 60  | 4.60 | 6 | 2 | 127.02 | 9  | 523.66 | 8  | 142.92 | 411.40 | -0.21 | 2.40 |
| 61  | 3.03 | 6 | 1 | 118.23 | 8  | 497.57 | 8  | 123.35 | 377.90 | -0.14 | 2.34 |
| 62  | 3.73 | 6 | 1 | 118.23 | 9  | 529.58 | 8  | 129.53 | 414.00 | -0.16 | 2.41 |
| 63  | 3.44 | 6 | 2 | 127.02 | 10 | 525.61 | 8  | 132.36 | 411.90 | -0.10 | 2.29 |
| 64  | 4.47 | 6 | 2 | 127.02 | 10 | 543.61 | 8  | 132.45 | 417.40 | -0.14 | 2.36 |
| 65  | 3.79 | 6 | 2 | 127.02 | 9  | 487.55 | 8  | 129.30 | 378.90 | -0.17 | 2.23 |
| 66  | 4.20 | 6 | 2 | 127.02 | 9  | 523.54 | 8  | 129.29 | 387.30 | -0.26 | 2.29 |
| 67  | 3.59 | 6 | 2 | 127.02 | 12 | 503.55 | 8  | 122.71 | 402.00 | -0.03 | 2.26 |
| 69  | 1.86 | 4 | 2 | 140.46 | 6  | 428.53 | 6  | 104.57 | 314.10 | 0.59  | 2.11 |
| 70  | 1.38 | 5 | 2 | 125.11 | 6  | 423.49 | 7  | 104.23 | 316.60 | 0.63  | 2.43 |
| 71  | 3.34 | 4 | 2 | 112.22 | 6  | 472.56 | 6  | 123.99 | 356.50 | 0.47  | 2.27 |
| 72  | 1.85 | 4 | 2 | 108.56 | 6  | 429.53 | 6  | 106.75 | 340.80 | 0.41  | 2.04 |
| 73  | 2.87 | 3 | 2 | 99.33  | 6  | 463.54 | 5  | 109.89 | 361.10 | 0.58  | 1.93 |
| 74  | 3.13 | 5 | 2 | 117.79 | 8  | 481.57 | 7  | 121.36 | 374.20 | 0.09  | 2.13 |
| 75  | 3.14 | 4 | 2 | 108.56 | 7  | 451.54 | 6  | 115.00 | 352.60 | 0.32  | 1.98 |
| 76  | 3.16 | 3 | 2 | 99.33  | 6  | 421.51 | 5  | 108.63 | 330.90 | 0.52  | 1.88 |
| 77  | 1.47 | 2 | 1 | 96.25  | 4  | 317.40 | 4  | 79.14  | 254.90 | 0.36  | 1.45 |
| 78  | 3.77 | 3 | 2 | 99.33  | 6  | 475.48 | 5  | 108.97 | 344.20 | 0.47  | 1.94 |
| 79  | 3.14 | 6 | 2 | 127.02 | 10 | 525.62 | 8  | 132.36 | 411.90 | -0.11 | 2.29 |
| 80  | 3.00 | 7 | 2 | 144.09 | 10 | 539.60 | 9  | 132.47 | 408.70 | 0.07  | 2.50 |
| 81  | 6.05 | 4 | 2 | 157.06 | 11 | 507.74 | 6  | 141.47 | 401.90 | -0.49 | 2.03 |
| 82  | 4.96 | 5 | 2 | 142.04 | 10 | 491.68 | 7  | 134.48 | 393.80 | -0.32 | 2.12 |
| 83  | 5.30 | 4 | 2 | 157.06 | 11 | 543.72 | 6  | 141.72 | 412.10 | -0.48 | 2.08 |
| 84  | 4.20 | 5 | 2 | 142.04 | 10 | 527.66 | 7  | 134.72 | 403.90 | -0.31 | 2.17 |
| 101 | 2.12 | 6 | 2 | 127.02 | 7  | 455.48 | 8  | 109.25 | 330.20 | -0.16 | 2.08 |
| 107 | 1.78 | 6 | 2 | 127.02 | 8  | 469.51 | 8  | 113.88 | 346.30 | -0.12 | 2.09 |
| 108 | 3.50 | 6 | 2 | 127.02 | 10 | 525.62 | 8  | 132.36 | 411.90 | -0.11 | 2.32 |
| 109 | 3.82 | 6 | 2 | 127.02 | 10 | 559.64 | 8  | 143.2  | 421.30 | -0.16 | 2.41 |
| 110 | 3.55 | 7 | 3 | 147.25 | 10 | 575.64 | 9  | 144.73 | 418.10 | 0.02  | 2.41 |
| 111 | 2.58 | 6 | 1 | 118.23 | 7  | 509.58 | 8  | 125.94 | 375.20 | -0.15 | 2.38 |

Calculated using <sup>a</sup>calculate property functionality in Maestro v10.1 (Schrödinger, LLC, New York, NY, 2015), <sup>b</sup>Qikprop (Mol. Wt. and No. of N and O; QikProp, Schrödinger, LLC, New York, NY, 2015), <sup>c</sup>ACD/Chemsketch (Molar refractivity and Molar volume; ACD/Labs 2017.1.2, Advanced Chemistry Development Inc. Toronto, Ontario, Canada) and <sup>d</sup>Open Notebook Science Challenge (A and B; <http://showme.physics.drexel.edu/onsc/models/AbrahamDescriptorsModel001.php>), <sup>e</sup>Could not be calculated (NC) by ACD/Chemsketch program.

AlogP, Atom based logP; HBA, Hydrogen Bond Acceptors; HBD, Hydrogen Bond Donors; PSA, Polar Surface Area; Rotatable bonds, No. of rotatable bonds; No. of N and O, Number of nitrogen and oxygen atoms; A, Hydrogen bond acidity; B, Hydrogen bond basicity.
